# Supplementary material for: Comparative analysis of the complete mitochondrial genomes of three rockfishes (Scorpaeniformes, Sebastiscus ) and insights into the phylogenetic relationships of Sebastidae
Source: Oxford University Press journal article supplement (doi:10.1042/bsr20203379), 2020-11-27
Supplement: bsr-2020-3379_supp.pdf [file bsr-2020-3379_supp.pdf]

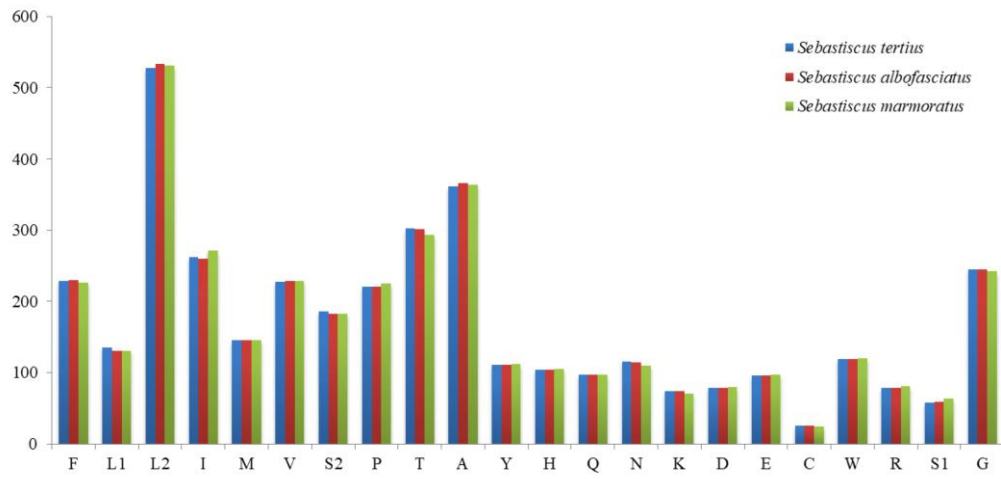

**Supplementary Figure S1.** Total codons in *S. tertius*, *S. albofasciatus*, and *S. marmoratus*.

**Table S1** *Sebastes*-specific universal primer sets.

| <b>Primer name</b> | <b>Sequence (5'–3')</b> | <b>Product Length (bp)</b> | <b>Primer name</b> | <b>Sequence (5'–3')</b> | <b>Product length (bp)</b> |
|--------------------|-------------------------|----------------------------|--------------------|-------------------------|----------------------------|
| S-1-F              | AAGGCTTGGTCCTGACTT      | 651                        | S-18-F             | AACCTGACCATGACACTAAG    | 632                        |
| S-1-R              | TTGTGCCAGTTGTGCTTA      |                            | S-18-R             | GCTACAGCAACTTCTAATAGG   |                            |
| S-2-F              | TATACGCATCCGAAGGTTAG    | 655                        | S-19-F             | CTGGTCACCTCTTAATTCAAC   | 653                        |
| S-2-R              | GGTGTCTCTTCAGTGTAAGG    |                            | S-19-R             | TTCGCTCTCCTTCCATAATG    |                            |
| S-3-F              | GGAGGCAAGTCGTAACAT      | 543                        | S-20-F             | GACCTCCTACGGGCATTA      | 563                        |
| S-3-R              | GGCTGAACTTCTATCCAATTC   |                            | S-20-R             | GGATTACGGAGAGCACAATA    |                            |
| S-4-F              | AACCTACCGAACCTAGTTATAG  | 541                        | S-21-F             | CTACTGATGAGGCTCTTAATCT  | 580                        |
| S-4-R              | TGCCGAGTTCCTTCTCTT      |                            | S-21-R             | GGTTCGATGGAATGCTAGG     |                            |
| S-5-F              | GGAGAGACCCTGCTAATATG    | 629                        | S-22-F             | GTCCATAATTGCTGATGACTC   | 573                        |
| S-5-R              | GCGGCTCTTAGTTGTAGG      |                            | S-22-R             | TAGGCTCAAGTGCTGTGT      |                            |
| S-6-F              | GCCTGAACTAATGGAACC      | 551                        | S-23-F             | ATCCTGCCTTACACCATTC     | 651                        |
| S-6-R              | TAAGGAGAGGACTTGAACC     |                            | S-23-R             | CAGGTTGAGCCAGTCATAA     |                            |
| S-7-F              | AATAGGCAAGAGGGCATAAC    | 556                        | S-24-F             | ACTAGGAGGATACGGTATAATC  | 615                        |
| S-7-R              | GAAATGGTTTGGGCTACG      |                            | S-24-R             | AGGAGGTGGAGGGCTATA      |                            |
| S-8-F              | ACTCACACTTGCCTTAACC     | 585                        | S-25-F             | ATGAACCCTTGTCTTAACG     | 634                        |
| S-8-R              | ACTCACAGGAATAGGACAGA    |                            | S-25-R             | ATGAGGTGATGATTGCTTCT    |                            |
| S-9-F              | TAGCCGAATATGCCAACAT     | 566                        | S-26-F             | ACCCAATCTTTACAACCCTA    | 666                        |
| S-9-R              | CTTGCGAAGGTAGTAGTAGT    |                            | S-26-R             | TAGCAGAGGGAAGTCAGG      |                            |
| S-10-F             | TCTTAACCGCCCTCCTATT     | 557                        | S-27-F             | TAGCGTGAATAGCAACCAA     | 622                        |
| S-10-R             | TACTATTCAGCCGAGATGTG    |                            | S-27-R             | TTGGAGAAGAATCCTGCTAG    |                            |
| S-11-F             | ATCCTTGACTAACCCTCAAC    | 661                        | S-28-F             | ACAGCCTTAATGACGAACA     | 668                        |
| S-11-R             | GTCCCGCAAGTCTTATCA      |                            | S-28-R             | TGATGAAGAAATGGCTTTGG    |                            |
| S-12-F             | CTACGCTATTGCTCCTACC     | 631                        | S-29-F             | CACACCACTTCTCCAATATAC   | 599                        |
| S-12-R             | GCATGTGCTGTAACGATTA     |                            | S-29-R             | TGGGATGTTAGTTGTGTTTG    |                            |
| S-13-F             | CGAGCAGAATTAAGCCAAC     | 641                        | S-30-F             | CACAACAGGACCACTCAC      | 591                        |
| S-13-R             | AAGCCAGGGAGGATAAGAA     |                            | S-30-R             | GGCGTGTAGATTTCCGATA     |                            |
| S-14-F             | GGTATCACGATGCTTCTAAC    | 644                        | S-31-F             | TAGCCATACATTACACCTCT    | 606                        |
| S-14-R             | AAGAACATAATGCCGAAGTG    |                            | S-31-R             | GGTCTCCTAGCAGATTGG      |                            |
| S-15-F             | CCACTTCCACTATGTTCTGT    | 533                        | S-32-F             | ACCCACTTGGTCTAAACTC     | 607                        |
| S-15-R             | GGCGGTGTAATGTGTTCT      |                            | S-32-R             | TCTCCTTTCTTTGAGCAGTA    |                            |
| S-16-F             | TCAAGCCGACCACATAAC      | 602                        | S-33-F             | TAGTAGCTCAGCGTCAGA      | 642                        |
| S-16-R             | GAGTGGAGTACATCGTCTG     |                            | S-33-R             | CCTTGCCCTATGGAGAGA      |                            |
| S-17-F             | GACAATCCGCCTATTAGAAG    | 627                        | S-34-F             | TAGTAAGAACCGACCAACAA    | 479                        |
| S-17-R             | GGTAGAGGAGTCAAGGTAAG    |                            | S-34-R             | GGCTTAGTTATCTCAGGAGTT   |                            |

**Table S2.** Specific primers used to amplify the mitogenomes of *S. tertius* and *S. albofasciatus*.

| <b>Species</b>                   | <b>Primer name</b> | <b>Sequence (5'–3')</b> | <b>Product length</b> |
|----------------------------------|--------------------|-------------------------|-----------------------|
| <i>Sebastiscus tertius</i>       | S-36-F             | GTTCAACCTACACTGGCATA    | 665                   |
|                                  | S-36-R             | GTGGTTTAGCTTCTCACTTATG  |                       |
|                                  | S-37-F             | AACTCCTGAGATAACTAACG    | 602                   |
|                                  | S-37-R             | CGGATACTTGCATGTGTAA     |                       |
| <i>Sebastiscus albofasciatus</i> | S-48-F             | GGGTTATCAAGGACATAAGTAG  | 850                   |
|                                  | S-48-R             | GCTGTAGGGCATTCTCAC      |                       |
| <i>Sebastiscus marmoratus</i>    | S-49-F             | TCAAGGACATAAGTGAGGAT    | 1237                  |
|                                  | S-49-R             | CAGGACCAAGCCTTTGTG      |                       |

**Table S3** Base composition of *Sebastiscus* mitochondrial genomes.

|        | <i>S. tertius</i> |       |       |       |       | <i>S. albofasciatus</i> |       |       |       |       | <i>S. marmoratus</i> |       |       |       |       |
|--------|-------------------|-------|-------|-------|-------|-------------------------|-------|-------|-------|-------|----------------------|-------|-------|-------|-------|
|        | A                 | T     | G     | C     | A+T   | A                       | T     | G     | C     | A+T   | A                    | T     | G     | C     | A+T   |
| Whole  | 28.30             | 26.70 | 16.60 | 28.40 | 55.04 | 28.44                   | 26.71 | 16.65 | 28.20 | 55.15 | 28.87                | 26.75 | 16.31 | 28.07 | 55.65 |
| PCGs-H | 26.10             | 28.39 | 15.33 | 30.19 | 54.48 | 26.17                   | 28.51 | 15.30 | 30.02 | 54.68 | 26.08                | 28.42 | 15.39 | 30.11 | 54.50 |
| PCGs-L | 14.37             | 37.55 | 34.10 | 13.98 | 51.92 | 14.40                   | 36.80 | 33.70 | 15.10 | 51.20 | 14.75                | 38.51 | 33.33 | 13.41 | 53.26 |
| rRNAs  | 31.49             | 20.77 | 21.67 | 26.07 | 52.26 | 31.61                   | 20.70 | 21.57 | 26.12 | 52.31 | 31.77                | 20.58 | 21.46 | 26.19 | 52.35 |
| D-loop | 35.15             | 34.19 | 12.76 | 17.90 | 69.34 | 35.87                   | 32.14 | 13.08 | 18.91 | 68.01 | 37.02                | 31.25 | 12.58 | 19.15 | 68.81 |
| ATP6   | 26.94             | 29.87 | 13.62 | 29.58 | 56.81 | 26.79                   | 29.87 | 13.47 | 29.87 | 56.66 | 27.23                | 28.99 | 13.03 | 30.75 | 56.22 |
| ATP8   | 29.17             | 23.21 | 13.10 | 34.52 | 52.38 | 28.57                   | 22.62 | 13.69 | 35.12 | 51.19 | 29.17                | 22.02 | 13.10 | 35.71 | 51.19 |
| COI    | 24.56             | 30.37 | 18.18 | 26.89 | 54.93 | 24.95                   | 30.37 | 17.86 | 26.82 | 55.32 | 24.80                | 30.60 | 17.70 | 26.80 | 55.40 |
| COII   | 28.80             | 28.08 | 16.50 | 26.63 | 56.87 | 29.09                   | 28.22 | 16.21 | 26.48 | 57.31 | 28.20                | 28.70 | 16.60 | 26.50 | 56.90 |
| COIII  | 25.61             | 27.77 | 17.07 | 29.55 | 53.38 | 25.10                   | 27.39 | 17.32 | 30.19 | 52.48 | 25.50                | 27.60 | 16.90 | 29.90 | 53.10 |
| Cytb   | 25.33             | 30.32 | 15.25 | 29.10 | 55.65 | 25.24                   | 30.15 | 15.07 | 29.54 | 55.39 | 24.80                | 30.85 | 15.43 | 28.92 | 55.65 |
| ND1    | 24.82             | 27.28 | 15.18 | 32.72 | 52.10 | 24.72                   | 27.90 | 15.59 | 31.79 | 52.62 | 24.92                | 27.49 | 15.49 | 32.10 | 52.41 |
| ND2    | 27.63             | 26.48 | 12.24 | 33.65 | 54.11 | 27.34                   | 26.29 | 12.52 | 33.84 | 53.63 | 26.80                | 26.70 | 13.10 | 33.40 | 53.60 |
| ND3    | 21.78             | 32.38 | 15.76 | 30.09 | 54.15 | 21.78                   | 32.66 | 16.05 | 29.51 | 54.44 | 21.78                | 32.95 | 16.05 | 29.23 | 54.73 |
| ND4    | 26.00             | 28.31 | 15.28 | 30.41 | 54.31 | 26.29                   | 28.60 | 14.99 | 30.12 | 54.89 | 26.34                | 27.65 | 14.88 | 31.13 | 53.99 |
| ND4L   | 20.88             | 28.28 | 17.17 | 33.67 | 49.16 | 21.89                   | 28.62 | 16.50 | 33.00 | 50.51 | 22.22                | 27.61 | 16.50 | 33.67 | 49.83 |
| ND5    | 28.00             | 26.81 | 14.14 | 31.05 | 54.81 | 28.22                   | 27.24 | 14.25 | 30.29 | 55.46 | 28.11                | 26.97 | 14.68 | 30.23 | 55.08 |
| ND6    | 14.37             | 37.55 | 34.10 | 13.98 | 51.92 | 14.37                   | 36.78 | 33.72 | 15.13 | 51.15 | 14.75                | 38.51 | 33.33 | 13.41 | 53.26 |

**Table S4** The codon number and relative synonymous codon usage in mitochondrial protein coding genes.

| Condon | Count |     |     | RSCU |      |      | Condon | Count |     |     | RSCU |      |      | Condon | Count |    |    | RSCU |      |      |
|--------|-------|-----|-----|------|------|------|--------|-------|-----|-----|------|------|------|--------|-------|----|----|------|------|------|
|        | ST    | SA  | SM  | ST   | SA   | SM   |        | ST    | SA  | SM  | ST   | SA   | SM   |        | ST    | SA | SM | ST   | SA   | SM   |
| UUU(F) | 110   | 112 | 111 | 0.96 | 0.97 | 0.98 | UCU(S) | 41    | 40  | 38  | 1.01 | 1    | 0.93 | UAU(Y) | 48    | 54 | 60 | 0.86 | 0.97 | 1.08 |
| UUC(F) | 119   | 118 | 116 | 1.04 | 1.03 | 1.02 | UCC(S) | 64    | 62  | 69  | 1.57 | 1.54 | 1.68 | UAC(Y) | 63    | 57 | 51 | 1.14 | 1.03 | 0.92 |
| UUA(L) | 108   | 104 | 100 | 0.98 | 0.94 | 0.91 | UCA(S) | 77    | 75  | 73  | 1.89 | 1.87 | 1.78 | AGU(S) | 19    | 18 | 18 | 0.47 | 0.45 | 0.44 |
| UUG(L) | 27    | 26  | 30  | 0.24 | 0.24 | 0.27 | UCG(S) | 4     | 5   | 4   | 0.1  | 0.12 | 0.1  | AGC(S) | 39    | 41 | 44 | 0.96 | 1.02 | 1.07 |
| CUU(L) | 154   | 162 | 157 | 1.39 | 1.47 | 1.43 | CCU(P) | 57    | 55  | 46  | 1.04 | 1    | 0.84 | CAU(H) | 32    | 30 | 32 | 0.62 | 0.58 | 0.6  |
| CUC(L) | 142   | 130 | 136 | 1.29 | 1.18 | 1.23 | CCC(P) | 93    | 98  | 106 | 1.69 | 1.78 | 1.94 | CAC(H) | 72    | 74 | 74 | 1.38 | 1.42 | 1.4  |
| CUA(L) | 186   | 200 | 181 | 1.68 | 1.81 | 1.64 | CCA(P) | 57    | 56  | 59  | 1.04 | 1.02 | 1.08 | CAA(Q) | 87    | 82 | 83 | 1.79 | 1.69 | 1.71 |
| CUG(L) | 46    | 41  | 57  | 0.42 | 0.37 | 0.52 | CCG(P) | 13    | 11  | 8   | 0.24 | 0.2  | 0.15 | CAG(Q) | 10    | 15 | 14 | 0.21 | 0.31 | 0.29 |
| AUU(I) | 162   | 164 | 173 | 1.24 | 1.26 | 1.29 | ACU(T) | 58    | 56  | 54  | 0.77 | 0.74 | 0.72 | AAU(N) | 54    | 51 | 53 | 0.94 | 0.89 | 0.94 |
| AUC(I) | 100   | 96  | 96  | 0.76 | 0.74 | 0.71 | ACC(T) | 111   | 111 | 113 | 1.47 | 1.48 | 1.51 | AAC(N) | 61    | 63 | 60 | 1.06 | 1.11 | 1.06 |
| AUA(M) | 90    | 94  | 90  | 1.24 | 1.29 | 1.23 | ACA(T) | 116   | 117 | 120 | 1.53 | 1.55 | 1.61 | AAA(K) | 64    | 64 | 68 | 1.73 | 1.73 | 1.86 |
| AUG(M) | 55    | 52  | 56  | 0.76 | 0.71 | 0.77 | ACG(T) | 18    | 17  | 12  | 0.24 | 0.23 | 0.16 | AAG(K) | 10    | 10 | 5  | 0.27 | 0.27 | 0.14 |
| GUU(V) | 61    | 72  | 64  | 1.07 | 1.26 | 1.13 | GCU(A) | 76    | 73  | 73  | 0.84 | 0.8  | 0.8  | GAU(D) | 23    | 26 | 28 | 0.58 | 0.66 | 0.71 |
| GUC(V) | 58    | 50  | 56  | 1.02 | 0.87 | 0.99 | GCC(A) | 160   | 168 | 164 | 1.77 | 1.84 | 1.81 | GAC(D) | 56    | 53 | 51 | 1.42 | 1.34 | 1.29 |
| GUA(V) | 81    | 82  | 83  | 1.42 | 1.43 | 1.46 | GCA(A) | 107   | 110 | 110 | 1.19 | 1.2  | 1.21 | GAA(E) | 73    | 75 | 77 | 1.52 | 1.56 | 1.6  |
| GUG(V) | 28    | 25  | 24  | 0.49 | 0.44 | 0.42 | GCG(A) | 18    | 15  | 16  | 0.2  | 0.16 | 0.18 | GAG(E) | 23    | 21 | 19 | 0.48 | 0.44 | 0.4  |
| UGU(C) | 6     | 6   | 5   | 0.46 | 0.46 | 0.38 | CGU(R) | 8     | 8   | 8   | 0.41 | 0.41 | 0.41 | GGU(G) | 37    | 35 | 43 | 0.6  | 0.57 | 0.7  |
| UGC(C) | 20    | 20  | 21  | 1.54 | 1.54 | 1.62 | CGC(R) | 19    | 18  | 18  | 0.96 | 0.91 | 0.92 | GGC(G) | 90    | 92 | 82 | 1.47 | 1.5  | 1.34 |
| UGA(W) | 106   | 106 | 104 | 1.78 | 1.78 | 1.75 | CGA(R) | 44    | 39  | 42  | 2.23 | 1.97 | 2.15 | GGA(G) | 79    | 82 | 85 | 1.29 | 1.34 | 1.39 |
| UGG(W) | 13    | 13  | 15  | 0.22 | 0.22 | 0.25 | CGG(R) | 8     | 14  | 10  | 0.41 | 0.71 | 0.51 | GGG(G) | 39    | 36 | 35 | 0.64 | 0.59 | 0.57 |

Notes: ST, *S. tertius*; SA, *S. albofasciatus*; SM, *S. marmoratus*
